1

2 **The IMMUNE-ASSOCIATED NUCLEOTIDE-BINDING 9 protein is a**  
3 **regulator of basal immunity in *Arabidopsis thaliana***

4

5 Yuanzheng Wang<sup>1,2,#</sup>, Yansha Li<sup>1</sup>, Tabata Rosas-Diaz<sup>1</sup>, Carlos Caceres-  
6 Moreno<sup>1,2</sup>, Rosa Lozano-Duran<sup>1</sup> and Alberto P. Macho<sup>1,\*</sup>.

7

8 <sup>1</sup>Shanghai Center for Plant Stress Biology, CAS Center for Excellence in  
9 Molecular Plant Sciences; Shanghai Institutes of Biological Sciences, Chinese  
10 Academy of Sciences, Shanghai 201602, China.

11 <sup>2</sup>University of Chinese Academy of Sciences, Beijing, China.

12 # Present address: Bio-Agriculture Institute of Shaanxi, Shaanxi Academy of  
13 Sciences, Xi'an 710032, China.

14

15 Running title: IAN9 is a regulator of plant basal immunity

16

17 Highlight: IAN9 and its interactor IAP1 act as negative regulators of basal  
18 immunity against bacterial pathogens in *Arabidopsis thaliana*.

19

20 \* Corresponding author: Alberto P. Macho, [alberto.macho@sibs.ac.cn](mailto:alberto.macho@sibs.ac.cn)

21

22 **Abstract**

23

24 A robust regulation of plant immune responses requires multitude of positive  
25 and negative regulators that act in concert. The immune-associated  
26 nucleotide-binding (IAN) gene family members are associated with immunity  
27 in different organisms, although no characterization of their function has been  
28 carried out to date in plants. In this work, we analyzed the expression patterns  
29 of *IAN* genes and found that *IAN9* is repressed upon pathogen infection or  
30 treatment with immune elicitors. *IAN9* encodes a plasma membrane-localized  
31 protein that genetically behaves as a negative regulator of immunity. A novel  
32 *ian9* mutant generated by CRISPR/Cas9 shows increased resistance to  
33 *Pseudomonas syringae*, while transgenic plants overexpressing *IAN9* show a  
34 slight increase in susceptibility. *In vivo* immunoprecipitation of IAN9-GFP  
35 followed by mass spectrometry analysis revealed that IAN9 associates with a  
36 previously uncharacterized C3HC4-type RING finger domain-containing  
37 protein that we named IAP1, for IAN9-associated protein 1, which also acts as  
38 a negative regulator of basal immunity. Interestingly, neither *ian9* or *iap1*  
39 mutant plants show any obvious developmental phenotype, suggesting that  
40 they display enhanced inducible immunity rather than constitutive immune  
41 responses. Since both *IAN9* and *IAP1* have orthologs in important crop  
42 species, they could be suitable targets to generate plants more resistant to  
43 diseases caused by bacterial pathogens without yield penalty.

44

45 Keywords: Arabidopsis, CRISPR/Cas9, IAN, plant disease, plant immunity,  
46 negative regulation, protein complex, *Pseudomonas syringae*.

## 47 **Introduction**

48

49 The plant immune system comprises an intricate network of receptors and  
50 regulators aimed at keeping the cellular homeostasis in the absence of  
51 pathogen threat and responding rapidly to biotic stimuli in order to prevent  
52 infection. Plants have evolved to perceive pathogen-derived molecules that  
53 constitute signals of a potential invasion, also called invasion patterns (Cook  
54 et al, 2015). Conserved microbial molecules constitute good targets for  
55 recognition by plants; some of these molecules have been shown to be  
56 perceived by plant cells as pathogen-associated molecular patterns (PAMPs;  
57 Boller and Felix, 2009). PAMPs are perceived at the cell surface by  
58 transmembrane pattern-recognition receptors (PRRs; Zipfel, 2014). PRRs act  
59 in coordination with several regulators and additional proteins that mediate  
60 signal transduction (Couto and Zipfel, 2016), including mitogen-activated  
61 protein kinases (MAPKs), calcium-dependent protein kinases (CDPKs),  
62 receptor-like cytoplasmic kinases (RLCKs), and respiratory burst oxidase  
63 homologs (RBOHs) (Macho and Zipfel, 2014; Bigeard et al, 2015).  
64 Downstream responses include the production of the phytohormone salicylic  
65 acid and antimicrobial compounds, the deposition of callose at the cell wall,  
66 and extensive transcriptional reprogramming (Boller and Felix, 2009). The  
67 activation of immunity is aimed at preventing the proliferation of the perceived  
68 pathogen, and prepares plant cells to mount an efficient defence response  
69 against subsequent biotic threats. However, defence is costly, in terms of  
70 energy investment and the concomitant disruption to the normal  
71 developmental program (Huot et al, 2014; Stael et al, 2015), and as such

72 needs to be tightly regulated. For this reason, immune responses are  
73 inducible, and negative regulators ensure a firm control of their activated  
74 state. On the other hand, it has been demonstrated that activation of defence  
75 and inhibition of growth can be uncoupled, so that active defence and growth  
76 can occur simultaneously, indicating that developmental alterations are the  
77 consequence of an active process, and not necessarily of limiting resources  
78 (De Wit et al, 2013; Campos et al, 2016; Scheres and van der Putten, 2017).

79

80 Pathogens have developed strategies to manipulate plant cells in order to  
81 proliferate inside plant tissues. These include the suppression of plant  
82 immunity, the alteration of the physical environment, and the acquisition of  
83 nutrients to support their pathogenic lifestyle (Win et al, 2012). In Gram-  
84 negative bacterial pathogens, the most important virulence factor is the type-  
85 III secretion system (T3SS), which injects effector proteins directly into plant  
86 cells (type-III-secreted effectors, T3Es). The manipulation of plant cellular  
87 functions by T3Es is essential for bacteria to proliferate and is required for the  
88 development of disease (Macho and Zipfel, 2015; Macho, 2016). However,  
89 some plants have evolved intracellular receptors that can perceive T3E  
90 activities as an indication of pathogen invasion, hence becoming resistant to  
91 bacterial infection. These receptors contain nucleotide-binding and leucine-  
92 rich repeat domains (NLRs; Khan et al, 2016). NLR activation contributes to  
93 the development of defence responses similar to those established after PRR  
94 activation, but are often more intense, and sometimes lead to local cell death,  
95 which prevents further pathogen proliferation and spread (Chiang and Coaker,

96 2015). Both PRRs and NLRs constitute the basis of plant innate immunity,  
97 and are the major determinants of basal immunity in plants.

98

99 Guanosine triphosphate (GTP)-binding proteins are regulators of various  
100 biological processes in eukaryotic cells, such as signal transduction, cell  
101 proliferation, cytoskeletal organization, and intracellular membrane trafficking,  
102 and are classified into numerous families (Takai et al, 2001; Vernoud et al,  
103 2003). IMMUNE-ASSOCIATED NUCLEOTIDE-BINDING/GTPases OF  
104 IMMUNITY-ASSOCIATED PROTEINS (IAN/GIMAP) proteins comprise a sub-  
105 family of GTPase-like proteins that has been found in anthozoans,  
106 vertebrates, and angiosperm plants (Nitta and Takahama, 2007; Weiss et al,  
107 2013). In vertebrates, proteins from the IAN/GIMAP family regulate the  
108 development and homeostasis of T cells and are associated with  
109 autoimmunity (Nitta and Takahama, 2007). The transcriptional regulation of  
110 genes encoding IAN/GIMAP proteins has been linked to immunity in different  
111 organisms: in mice, *IAN/GIMAP* genes are mostly expressed in immune  
112 tissues (Nitta et al, 2006), and they have also been reported as induced in  
113 corals after treatment with the bacterial immune elicitor muramyl dipeptide  
114 (MDP) (Weiss et al, 2013). In Arabidopsis, IAN/GIMAP proteins are defined by  
115 the presence of an avrRpt2-induced gene 1 (AIG1) domain, and contain  
116 conserved GTP-binding domains, including a P-loop motif known to bind  
117 GTP/GDP in Ras GTPases (Bourne et al, 1991), and coiled-coil motifs (Liu et  
118 al, 2008). Originally, *AtAIG1* (also known as *IAN8*) was defined as a gene  
119 overexpressed in response to the avirulent bacterial strain *Pseudomonas*  
120 *syringae* pv. *maculicola* (*Pma*) expressing the effector AvrRpt2 (Reuber and

121 Ausubel, 1996). Additionally, computational analysis of transcriptomic data  
122 has revealed that the transcription of other *IAN* family members responds to  
123 different biotic stimuli: nematode infection induces the expression of *IAN3* and  
124 *IAN11*, while the transcription of *IAN11*, *IAN12* and *IAN13* is reduced by  
125 infection with *Myzus persicae* (Liu et al, 2008).

126

127 Despite the accumulating evidences that associate *IAN* genes with immunity  
128 in plants, no characterization of their function in this process has been carried  
129 out to date. Here, we analyzed the expression patterns of *IAN* genes and  
130 found that the expression of *IAN9* is repressed upon pathogen infection or  
131 treatment with immune elicitors. Further characterization indicated that *IAN9*  
132 encodes a plasma membrane-localized protein and that it genetically behaves  
133 as a negative regulator of immunity. *In vivo* immunoprecipitation of *IAN9*-GFP  
134 followed by mass spectrometry analysis revealed that *IAN9* associates with a  
135 C3HC4-type RING finger domain-containing protein that we named IAP1, for  
136 I*AN9*-associated protein 1. Interestingly, our results show that IAP1, like *IAN9*,  
137 negatively regulates immunity, raising the idea that these two proteins may  
138 work together in the control of immune responses.

139

140 **Results**

141

142 **Expression analysis of the *IAN* gene family upon bacterial infection**  
143 **reveals differential expression patterns for *IAN7*, *IAN8*, and *IAN9***

144 The *IAN* protein family in *Arabidopsis* is composed of 13 members (Liu et al,  
145 2008; Figure 1A). Phylogenetic analysis of *IAN* amino acid sequences shows  
146 a clear separation in different subgroups (Figure 1A, Figure S1). Previous  
147 reports have described changes in expression of *IAN* gene family members  
148 upon different biotic stimuli (Reuber and Ausubel, 1996; Liu et al, 2008). In  
149 order to characterize the transcriptional response of *IAN* genes to bacterial  
150 infection, we inoculated nine- to ten day-old *Arabidopsis* seedlings with the  
151 virulent pathogen *Pseudomonas syringae* pv. *tomato* (*Pto*) DC3000. Three  
152 *IAN* genes showed differential expression patterns upon bacterial infection:  
153 *IAN7* and *IAN8* showed a significant up-regulation, while *IAN9* showed a  
154 significant down-regulation (Figure 1B). We did not detect mRNA for  
155 *IAN1/2/4/6/10/11/12/13*, suggesting that these genes are not expressed in 10  
156 day-old *Arabidopsis* seedlings in our experimental conditions. The pathogen-  
157 induced up-regulation of *IAN8* is reminiscent of the originally reported up-  
158 regulation of this gene by bacteria expressing the effector *AvrRpt2*, which  
159 induces activation of the plant NLR *RPS2* (Reuber and Ausubel, 1996).  
160 Accordingly, we found that the differential expression of *IAN7/8* and *IAN9* also  
161 takes place upon infection of *Arabidopsis* rosette leaves with *Pto* expressing  
162 *AvrRpt2* (Figure 1C). The particular expression pattern of *IAN9* among the  
163 *IAN* gene family suggests an exclusive function for *IAN9* rather than functional  
164 redundancy with other *IAN* family members. This idea is supported by the fact

165 that *IAN9* constitutes a specific phylogenetic group within the *IAN* gene family  
166 (Figure 1A). For these reasons, we decided to focus our attention on *IAN9*.

167

### 168 ***IAN9* expression is reduced upon chemical activation of plant immunity**

169 *IAN9* is broadly expressed in cotyledons, hypocotyls, and roots of *Arabidopsis*  
170 seedlings (Figure S2). To dissect the bacteria-induced repression of *IAN9*  
171 transcription, we sought to determine whether perception of purified immune  
172 elicitors affects *IAN9* expression. For this purpose, we first treated  
173 *Arabidopsis* seedlings with the flagellin-derived peptide flg22, which is widely  
174 used as an elicitor of immune responses. Our results show that *IAN9*  
175 expression is significantly reduced one hour after flg22 treatment (Figure 2A).  
176 The perception of different invasion patterns, including flg22, leads to the  
177 production of the phytohormone salicylic acid (SA), which is a key player in  
178 the activation of plant immunity against biotrophic pathogens (Vlot et al.,  
179 2009). Treatment with SA for three hours led to a reduction of *IAN9*  
180 expression, although the abundance of *IAN9* transcripts returned to basal  
181 levels after a 6-hour SA treatment (Figure 2B), revealing a transient down-  
182 regulation of *IAN9* transcript abundance upon SA treatment. Finally, to  
183 determine whether the reduction on *IAN9* transcription upon flg22 treatment  
184 depends on the downstream SA accumulation (Tsuda et al., 2008), we  
185 performed flg22 treatment in the SA-depleted *sid2/NahG* plants, deficient in  
186 pathogen-induced SA biosynthesis (Wildermuth et al. 2001) and constitutively  
187 expressing the bacterial salicylate hydroxylase NahG, which degrades SA  
188 (Delaney et al., 1994). Interestingly, the flg22-triggered down-regulation of  
189 *IAN9* transcript abundance was also observed in *sid2/NahG* plants (Figure



190 2C), suggesting that SA is not required for the flg22-induced transcriptional  
191 repression of *IAN9*.

192

### 193 **IAN9 localizes to the plasma membrane through its C-terminus**

194 In order to investigate the subcellular localization of IAN9, we generated  
195 stable transgenic Arabidopsis lines expressing an N-terminal GFP-tagged  
196 IAN9 protein (see below for a detailed characterization of these lines), and  
197 used confocal microscopy to determine the localization of GFP-IAN9.  
198 Contrary to free GFP, which shows a nuclear/cytoplasmic localization, GFP-  
199 IAN9 specifically localized at the cell periphery (Figure 3A). This localization  
200 was similar to that observed for well-characterized plasma membrane (PM)-  
201 localized proteins, such as the brassinosteroid (BR) receptor BRI1 (Wang et  
202 al., 2001; Figure 3A). To determine whether GFP-IAN9 is associated to  
203 membranes, we used the lipophilic fluorescent dye FM4-64, which is rapidly  
204 incorporated into membranes upon contact with plant cells (Fischer-Parton et  
205 al., 2000; Bolte et al., 2004). Our results show that GFP-IAN9 fluorescence  
206 co-localizes with FM4-64-labeled compartments (Figure 3B and 3C), similar to  
207 BRI1-GFP fluorescence, and different from free GFP (Figure 3B and 3C). To  
208 further confirm that IAN9 localizes at the PM, we performed plasmolysis  
209 assays by treating plant tissues with 1 M NaCl. Upon plasmolysis, both GFP-  
210 IAN9 and BRI1-GFP were detected in Hechtian strands, which represent sites  
211 of incomplete PM retraction from the cell wall (Figure 3D). Altogether, our  
212 microscopy analysis indicates that IAN9 localizes at the PM in plant cells.  
213 The C-terminal domain is not conserved among IAN proteins (Figure S1).  
214 Interestingly, the C-terminal sequence of IAN9 shows an over-representation

215 of positively charged amino acids (KKLRENLERAEKETKELQKKLGKCINL;  
216 33.3% of R/K), not present in other IAN proteins (Figure S1 and S3A), which  
217 could mediate an interaction with the negatively charged phospholipids of the  
218 PM. To test this hypothesis, we generated Arabidopsis stable transgenic lines  
219 expressing a truncated GFP-IAN9 version lacking the 27 C-terminal amino  
220 acids (IAN9 $\Delta$ C-27). The IAN9 $\Delta$ C-27 version lost the specific PM localization  
221 seen for wild type GFP-IAN9, and was mostly detected in the cytoplasm  
222 (Figure S3B). Additionally, we found that, when GFP is fused to the C-terminal  
223 end of IAN9 (IAN9-GFP), this protein loses its specific PM localization, and is  
224 mostly found in the cytoplasm (Figure S3B). Compared to IAN9, the IAN8 C-  
225 terminus has a lower representation of positively charged amino acids  
226 (18.5%; Figure S3A), and we found that a N-terminal GFP-tagged IAN8 (GFP-  
227 IAN8) localizes to the cytoplasm (Figure S3C). Altogether, these results  
228 suggest that the exclusive C-terminal domain of IAN9 is required for its  
229 localization at the PM.

230

### 231 **Generation of *IAN9* knock-out and overexpression lines**

232 Public repositories for Arabidopsis T-DNA insertion lines contain four  
233 independent lines with T-DNA insertions in the *IAN9* genomic locus:  
234 *SAIL\_167\_B02*, *SALK\_534\_B01*, *SALK\_144369*, and *GK-146B08*. For all  
235 these lines, the insertion site is located in the predicted promoter region of  
236 *IAN9*. Among them, *GK-146B08* is the line harboring the nearest T-DNA  
237 insertion to the *IAN9* start codon (Figure S4A), and therefore we chose this  
238 line for further analyses. Sequencing analysis results showed that the  
239 insertion site is located 76 bp upstream of the 5'-UTR of the *IAN9* gene, and

240 319 bp upstream of the *IAN9* start codon (Figure S4A and S4B). RT-PCR and  
241 RT-qPCR analyses showed that this mutant has approximately a 3-fold  
242 reduction in the amount of *IAN9* transcripts (Figure S4C and S4D), indicating  
243 that this line is a knockdown *ian9* mutant. To further characterize this line, we  
244 determined the *IAN9* transcript levels upon bacterial inoculation. Surprisingly,  
245 we found that *IAN9* transcript levels increased significantly upon inoculation  
246 with *Pto* or *Pto* (AvrRpt2), reaching higher levels than those observed in wild  
247 type plants (Figure 1 and S4E). These findings indicate that the T-DNA  
248 insertion in the *IAN9* promoter generates an aberrant expression pattern of  
249 *IAN9* in this line, rendering it unusable for the functional characterization of  
250 this gene.

251 In order to perform genetic analysis of the contribution of *IAN9* to plant  
252 immunity, we generated *ian9* mutant lines using CRISPR/Cas9-assisted  
253 genome editing (Feng et al, 2013; Mao et al, 2013). We selected the best  
254 predicted target site in the *IAN9* gene sequence for recognition by the  
255 Cas9/sgRNA complex (Figure S5), and performed the targeted mutagenesis  
256 as explained in the methods section. Sequencing of the resulting line showed  
257 an addition of 1 base pair in the second exon of *IAN9*, creating a premature  
258 stop codon 366 base pairs downstream of the start codon (Figure S6A), which  
259 generates a truncated protein with a disrupted GTP-binding domain. Upon  
260 selection of seedlings containing the *ian9* mutation in homozygosis, we  
261 selected a line in which the Cas9 gene was segregated out (Figure S6B); this  
262 Cas9-free *ian9* line was used for further experiments. Additionally, as  
263 mentioned before, we generated Arabidopsis transgenic lines overexpressing  
264 *IAN9* in a Col-0 wild type background, using a 35S promoter to express a

265 *GFP-IAN9* fusion. We selected two independent homozygous lines that  
266 accumulated detectable amounts of GFP-*IAN9* fusion protein (Figure S6C),  
267 and higher transcript levels of *IAN9* compared to those in Col-0 wild type (OE-  
268 *GFP-IAN9*#3-10 and OE-*GFP-IAN9*#7-1) (Figure S6D). As controls, we  
269 selected two independent homozygous lines expressing free GFP, which did  
270 not show changes in *IAN9* transcription and accumulated detectable levels of  
271 free GFP (Figure S6C and S6D). Interestingly, although the 35S promoter led  
272 to high *IAN9* expression compared to Col-0 wild type, bacterial infection still  
273 caused a reduction in *IAN9* transcript levels (Figure S7), suggesting a post-  
274 transcriptional regulation of the abundance of *IAN9* transcripts.  
275 Overexpression of *IAN9* did not affect *IAN8* expression in basal conditions or  
276 upon bacterial infection (Figure S7).

277

### 278 **Plant growth and early immune responses are not affected by altered** 279 **expression of *IAN9***

280 Both *IAN9* overexpressing or *ian9* knockout seedlings and adult plants were  
281 visually indistinguishable from the wild type (Figure S8 and S9). Given the  
282 predicted association of the IAN family to immune responses and the  
283 alteration in *IAN9* expression upon elicitation with flg22, we sought to  
284 determine whether *IAN9* is involved in early PTI responses, namely the flg22-  
285 triggered burst of reactive oxygen species (ROS), and the activation of a  
286 cascade of mitogen-activated protein kinases (MAPKs) (Boller & Felix, 2009,  
287 Macho & Zipfel, 2014). Our results show that mutation or overexpression of  
288 *IAN9* did not have a detectable impact in the dynamics or total accumulation  
289 of ROS upon flg22 treatment (Figure S8B, S8C and Figure S10). Similarly,

290 neither mutant nor overexpression (OE) lines showed differences in flg22-  
291 triggered MAPK activation compared to wild type plants or free GFP-  
292 expressing controls (Figure S8D and S8E). Taken together, these results  
293 suggest that alterations of *IAN9* expression do not affect early PTI responses.

294

### 295 **IAN9 negatively regulates plant immunity against *Pto* DC3000**

296 To test whether *IAN9* contributes to plant immunity against bacterial  
297 pathogens, we performed surface inoculation of the *ian9* mutant line with *Pto*  
298 DC3000 and determined bacterial replication in plant tissues. Our results  
299 show that knockout mutation of *IAN9* increased plant resistance against *Pto*  
300 DC3000, causing a 13-fold reduction on bacterial titers (Figure 4A). This  
301 increase in disease resistance does not seem to be caused by differences in  
302 basal expression of SA-dependent defense-related genes (Figure S11). In  
303 order to test whether the increase in resistance also occurs in a context of  
304 ETI, we syringe-infiltrated Arabidopsis rosette leaves with *Pto* DC3000  
305 (AvrRpt2). However, no differences were detected in terms of replication of  
306 this strain (Figure 4B). To confirm that the observed increased resistance to  
307 *Pto* DC3000 is really due to the absence of *ian9*, we generated  
308 complementation lines expressing *GFP-IAN9*, driven by a 35S promoter, in  
309 the *ian9* knockout mutant background, where the GFP-*IAN9* protein  
310 accumulated and localized to the PM (Figure S12A and S12B). Expression of  
311 GFP-*IAN9* in the *ian9* background was able to rescue the level of growth of  
312 *Pto* DC3000 to that observed in wild type plants (Figure S12C), confirming the  
313 association of *IAN9* with the observed increased resistance. Interestingly,  
314 transgenic lines overexpressing GFP-*IAN9* in a wild type background showed

315 a tendency to support higher bacterial loads compared to wild type or GFP-  
316 expressing lines, suggesting that IAN9 overexpression suppresses plant  
317 immunity against *Pto* DC3000, although such tendency was not always  
318 reproducible or statistically significant across eight independent biological  
319 repeats (Figure S13). This trend was not observed when plants were  
320 inoculated with a hypo-virulent DC3000 derivative unable to produce the  
321 virulence factor coronatine (*Pto* DC3000 COR-; Figure S14) (Melotto et al,  
322 2006).

323

#### 324 **Identification of IAN9-interacting proteins**

325 To characterize further the mode of action of IAN9, we searched for proteins  
326 physically associated with IAN9 in plant cells using Arabidopsis seedlings  
327 expressing *GFP-IAN9* (line OE-*GFP-IAN9#3-10*) and seedlings expressing  
328 free GFP as control. Upon GFP immunoprecipitation (IP) using agarose  
329 beads coupled to an anti-GFP nanobody (GFP-Trap beads), we detected  
330 associated proteins using liquid chromatography coupled to tandem mass-  
331 spectrometry (LC-MS/MS). In order to detect potential dynamic interactions,  
332 we additionally treated seedlings for one hour with flg22 or SA before  
333 immunoprecipitation. Two independent biological replicates showed a large  
334 number of proteins physically associated with IAN9, which we filtered using  
335 the following criteria: 1. Presence in both biological replicates; 2. Detection of  
336 two or more exclusive unique peptides; 3. Absence in the GFP control. After  
337 applying these filters, a total of 14 proteins were identified as IAN9 candidate  
338 interactors (Table S1).

339

340 Among these candidate interactors, we drew our attention to an  
341 uncharacterized protein encoded by the AT1G18660 gene (Table S1), which  
342 we named IAP1 for IAN9-ASSOCIATED PROTEIN1. Although our  
343 experimental approach does not provide a quantitative assessment of protein  
344 interactions, we noticed that the number of detected IAP1 peptides decreased  
345 in samples treated with SA, while it did not change substantially in samples  
346 treated with flg22 (Table S1). Domain analysis predicts the presence of three  
347 tetratricopeptide-like helical (TPR) domains, a C3HC4-type RING finger  
348 domain, and an ATP-dependent protease La (LON) domain in this protein  
349 (Figure S15A). Upon *Agrobacterium*-mediated transient expression in  
350 *Nicotiana benthamiana*, a GFP-IAP1 fusion protein localized at the cell  
351 periphery, nucleus (weakly), and around the nucleus; the latter most likely  
352 corresponds to the usual endoplasmic reticulum localization of PM-localized  
353 proteins overexpressed in this system (Figure S15B and S15C). Co-  
354 expression with RFP-IAN9 showed that both proteins co-localize upon  
355 transient expression (Figure 5A). To confirm the interaction between IAN9 and  
356 IAP1, we performed a targeted co-IP using GFP-IAP1 and an N-terminal  
357 fusion of IAN9 to the C-terminal domain of luciferase (Cluc-IAN9). Co-IP  
358 assays show that GFP-IAP1 interacts with Cluc-IAN9, but not with Cluc alone  
359 (Figure 5B); Cluc-IAN9 does not interact with free GFP (Figure S16). To  
360 determine whether the IAN9-IAP1 interaction is direct, we performed a  
361 luciferase complementation assay, transiently co-expressing Cluc-IAN9 and  
362 IAP1 fused to the N-terminal domain of luciferase (IAP1-Nluc). A positive  
363 control co-expressing AtSGT1b-Nluc and Cluc-AtRAR1 showed a strong  
364 luciferase signal (Figure S17A), as described before (Chen et al., 2008). On

365 the contrary, tissues co-expressing Cluc-IAN9 and Nluc-IAP1 did not show  
366 any detectable luciferase signal (Figure S17A), although both proteins  
367 accumulated (Figure S17B). As an alternative technique to detect direct  
368 interactions, we employed FRET-FLIM by co-expressing GFP-IAP1 and RFP-  
369 IAN9. However, no difference in GFP fluorescence lifetime was detected  
370 when compared to control samples (Figure S17C). Although an influence of  
371 the tags cannot be ruled out, these results suggest that the interaction  
372 observed for IAP1 and IAN9 is most likely indirect.

373

#### 374 **IAP1 negatively regulates plant immunity against *Pto* DC3000**

375 Public repositories for Arabidopsis T-DNA insertion lines contain two  
376 independent lines with T-DNA insertions in the *IAP1* genomic locus:  
377 *SALK\_119114* and *SALK\_093498* (Figure S18A). We isolated homozygous  
378 lines containing these insertions (Figure S18B) and confirmed the absence of  
379 *IAP1* transcripts (Figure S18C), naming these lines *iap1-1* and *iap1-2*,  
380 respectively (Figure S18A). Both lines displayed wild-type-like growth and  
381 development when grown on soil under short-day conditions (Figure 6A),  
382 although mutant seedlings showed a slightly reduced root length compared to  
383 Col-0 wild type when grown in vertical MS plates (Figure S19).

384 To determine whether mutations in *IAP1* have an impact on plant resistance  
385 against bacterial pathogens, we performed surface inoculation of the *iap1*  
386 mutant lines with *Pto* DC3000. Our results show that both *iap1-1* and *iap1-2*  
387 mutant lines are more resistant than Col-0 wild type against *Pto* DC3000,  
388 showing a 19-fold reduction on bacterial loads (Figure 6B). However, none of  
389 these lines showed differences after inoculation with *Pto* expressing AvrRpt2



390 (Figure 6C). This enhancement of disease resistance did not seem to be  
391 caused by differences in basal expression of SA-dependent defense-related  
392 genes (Figure S11). Interestingly, these results resemble those obtained  
393 during the characterization of the *ian9* knockout mutant line (Figure 4),  
394 suggesting that both proteins are involved in the negative regulation of basal  
395 immunity against bacterial pathogens, and may act in the same pathway  
396 through physical association.  
397

398 **Discussion**

399

400 In this work, we characterized the transcription patterns of *IAN* family  
401 members in *Arabidopsis* upon infection with the bacterial pathogen *Pto*  
402 DC3000. *IAN7* and *IAN8*, which seem to form a separate phylogenetic  
403 subgroup, are up-regulated upon bacterial infection. On the contrary, *IAN9*  
404 seems to form a specific subgroup and shows a unique down-regulation upon  
405 bacterial infection. Infection with a virulent bacterial pathogen, such as *Pto*  
406 DC3000, triggers changes in plant cells caused by bacterial virulence  
407 activities (e.g. alteration of plant processes by T3Es) and basal immune  
408 responses. Therefore, formally, transcriptional changes upon infection could  
409 be associated with bacterial virulence or plant immunity. In this case, the  
410 down-regulation of *IAN9* expression upon bacterial infection seems  
411 associated with the activation of immunity, since we detected similar  
412 expression patterns upon treatment with elicitors of immunity, namely flg22  
413 and SA. Interestingly, we detected a reduction in the amount of *IAN9*  
414 transcripts after bacterial infection even in transgenic lines where *IAN9*  
415 overexpression is driven by a constitutive 35S promoter, suggesting a post-  
416 transcriptional regulation of *IAN9* transcript abundance. Although the  
417 perception of flg22 leads to the production of SA (Tsuda et al., 2008), our data  
418 show that the flg22-triggered reduction of *IAN9* transcription takes place in  
419 *sid2/NahG* plants, indicating that this transcriptional change is independent of  
420 the observed SA-triggered reduction of *IAN9* transcription. SA-deficient  
421 mutants are partially affected in flg22-triggered induction of defence-related  
422 genes, probably caused by lower levels of the flg22 receptor FLS2 (Yi et al.,

423 2014). Our results indicate that these lower levels of FLS2 in *sid2/NahG*  
424 plants are nevertheless sufficient to trigger the *IAN9* transcriptional  
425 repression, suggesting that *IAN9* transcription may be highly sensitive to  
426 external biotic stimuli.

427

428 Besides showing different expression patterns, the subcellular localization of  
429 *IAN9* (mostly at the PM) is also different from that of *IAN8* (mostly in the  
430 cytoplasm). This differential localization further suggests distinct functions for  
431 these two IAN family members. The C-terminal domain of *IAN9*, required for  
432 PM localization, is not present in other IAN proteins. This could indicate that  
433 the *IAN9* mechanism for PM attachment is exclusive within the IAN family,  
434 although other IAN proteins could localize at the PM through different means.

435

436 Mutation of *IAN9* causes increased resistance to *Pto* DC3000, and this  
437 phenotype is rescued in complementation lines. It is worth considering the  
438 possibility that *IAN9* is guarded by NLRs as it has been shown for some  
439 regulators of immunity (Khan et al, 2016), therefore explaining the increased  
440 resistance in the *ian9* knockout mutant. However, the absence of  
441 developmental phenotypes or constitutive immune responses makes this  
442 possibility unlikely. Additionally, overexpression lines show a tendency for  
443 increased susceptibility, although this phenotype was not always significant or  
444 reproducible, and this trend was not observed upon inoculation with a hypo-  
445 virulent *Pto* DC3000 derivative strain. The lack of robustness in this  
446 phenotype could suggest that *IAN9* transcript abundance is not rate limiting;  
447 however, it could also be due to the potential post-transcriptional regulation of

448 *IAN9* transcript abundance that we have seen in the *IAN9* overexpression  
449 lines, which show a reduction in the amount of *IAN9* transcripts after bacterial  
450 infection. The transient nature of *IAN9* transcriptional repression upon SA  
451 treatment, returning to basal levels after 6 hours, may indicate that the  
452 negative regulation exerted by *IAN9* could be required to contribute to the  
453 repression of immune responses after immunity has been established.

454

455 Using IP followed by LC-MS/MS, we found IAP1 as a protein associated with  
456 *IAN9*. IAP1 contains three tetratricopeptide-like helical (TPR) domains, a  
457 C3HC4-type RING finger domain, and an ATP-dependent protease La (LON)  
458 domain. Upon transient expression, IAP1 co-localizes with *IAN9* in *N.*  
459 *benthamiana* cells. Genetic analysis indicates that both *IAN9* and IAP1  
460 negatively regulate immunity against *Pto* DC3000. Given their physical  
461 association, it is possible that both proteins belong to a protein complex  
462 involved in the negative regulation of basal immunity against bacterial  
463 pathogens. Although we confirmed the association between *IAN9* and IAP1  
464 using targeted IP, we failed to detect a direct physical interaction using  
465 luciferase complementation or FRET-FLIM assays. Specific limitations of  
466 interaction techniques may be hindering the detection of a direct interaction;  
467 however, these data may also indicate that the interaction between *IAN9* and  
468 IAP1 is indirect, perhaps mediated by other scaffolding components in the  
469 same protein complex. The Arabidopsis Interactome Database  
470 ([http://interactome.dfci.harvard.edu/A\\_thaliana/index.php](http://interactome.dfci.harvard.edu/A_thaliana/index.php)) has reported  
471 several interactors for IAP1 in Y2H assays (Table S2). Interestingly, several of  
472 these interacting proteins are transcription factors, and others have predicted

473 nuclear localization or undergo nucleo-cytoplasmic re-localization associated  
474 to their activity (Table S2). Considering that IAP1 interacts with several  
475 proteins with nuclear activities, it is tempting to speculate that the IAN9/IAP1  
476 complex could associate with transcriptional regulators in the absence of  
477 biotic stress, acting as negative regulators of immune responses, and the  
478 complex may dissociate upon pathogen infection to allow for the activation of  
479 executor immune responses that restrict pathogen proliferation. This  
480 hypothetical model is in agreement with the observation that IAN9 does not  
481 seem to regulate early elicitor-induced responses (namely flg22-triggered  
482 ROS burst and MAPK activation). Given that *ian9* or *iap1* mutants do not  
483 show auto-immunity phenotypes, the final activation of immune responses  
484 may require additional activation by other immune regulators, of which the  
485 activity could be facilitated by the absence of IAN9 or IAP1.

486

487 The identification of sustainable sources of resistance against plant  
488 pathogens is essential to minimize crop losses due to diseases. A well-  
489 established approach consists on the mutation of negative regulators of  
490 immunity, or the so-called susceptibility genes, although this often leads to  
491 fitness costs or auto-immunity phenotypes, which obstruct their applicability in  
492 agriculture. Disease resistance based on loss-of-function mutations in *Mildew*  
493 *resistance locus o (Mlo)* genes is one of the best-known examples of this  
494 approach (reviewed in Kusch & Panstruga, 2017). However, *mlo* mutations  
495 sometimes have pleiotropic effects that may affect plant yield and increase  
496 susceptibility to other pathogens (Kusch & Panstruga, 2017). Altogether, our  
497 results reveal *IAN9* and *IAP1* as suitable targets for biotechnological

498 approaches to generate crops with increased disease resistance to bacterial  
499 pathogens, since both *IAN9* and *IAP1* have orthologs in agriculturally  
500 important crop species (Figure S20 and S21). Interestingly, *IAN9* and *IAP1*  
501 behave as negative regulators of basal immunity, since *ian9* and *iap1*  
502 knockout plants show increased resistance to bacterial infection, but they do  
503 not show obvious differences compared to wild-type plants in terms of size or  
504 development. It remains to be determined whether the mutation of *IAN9* or  
505 *IAP1* orthologs in other plant species will have an impact on the plant  
506 response to other biotic or abiotic stresses. Alternative strategies to engineer  
507 resistance to plant diseases consider the pathogen-induced transcriptional  
508 and translational control of immune regulators (Gurr & Rushton, 2005; Xu et  
509 al, 2017). These strategies show that it is possible to generate plants where  
510 the expression of defence-related genes is restricted to cells undergoing  
511 pathogen attack, thus avoiding side effects on plant fitness. Current  
512 regulations hinder the use of transgenic plants to generate disease-resistant  
513 crops. Our *IAN9* mutagenesis approach shows that it is feasible to design  
514 CRISPR/Cas9-mediated strategies to obtain stable non-transgenic mutant  
515 plants with increased resistance to pathogens and no obvious developmental  
516 defects, paving the way to a potential application in breeding for disease  
517 resistance.

518

519 **Materials and Methods**

520

521 **Plant materials and growth conditions**

522 Arabidopsis seeds were sterilized with bleach solution (20% bleach and 0.1%  
523 Triton X-100) for 2-3 minutes, then washed with sterile water 4-5 times and  
524 sown on solid ½ MS medium (2.21 g Murashige & Skoog Basal Medium with  
525 Vitamins, 15 g Sucrose, 7 g Agar. 1 L). After stratification at 4°C for 3 days,  
526 the plates were transferred to a growth chamber (22°C, 16 h light/8 h dark) for  
527 germination and growth. For experiments involving mature Arabidopsis plants,  
528 sterile seeds were firstly stratified at 4°C for 3 days, then transferred to soil.  
529 Plants for bacterial infection assays were cultivated in a short day chamber  
530 (22°C, 8 h light/16 h dark photoperiod, 65% humidity). Plants for  
531 *Agrobacterium* transformation were grown in a long day growth room (22°C,  
532 16 h light/8 h dark photoperiod).

533

534 **Bacterial infections**

535 *Pseudomonas syringae* pv *tomato* DC3000 (*Pto* DC3000) and DC3000  
536 (AvrRpt2) were streaked on selective ½ salt LB plates (10 g Tryptone, 5 g  
537 Yeast Extract, 5 g NaCl, 15 g Agar per 1 L) and cultivated at 22°C for 2 days.  
538 For *Pto* DC3000, bacteria were collected from the plates into sterile water, the  
539 OD was adjusted to a value of 0.1 ( $5 \times 10^7$  cfu/ml) or 0.2 ( $10^8$  cfu/ml), and  
540 silwet-L77 was added to a final concentration of 0.03% before performing  
541 spray inoculation onto 3-4 week-old soil-grown Arabidopsis under short day  
542 conditions. The plants were then covered with cling wrap for 3 hours. The  
543 whole plants were harvested in 1.5 ml microcentrifuge tubes and weighed. For

544 *Pto* DC3000 (AvrRpt2), the OD was adjusted to 0.1 ( $5 \times 10^7$  cfu/ml) or 0.001  
545 ( $10^5$  cfu/ml). The bacterial suspension was pressure-infiltrated into 5-6 week-  
546 old short day-grown *Arabidopsis* leaves with a needleless syringe (3 leaves  
547 per plant), and leaf discs were collected into 1.5 ml tubes using a leaf punch  
548 at three days post-inoculation. In both cases, plant tissues were ground and  
549 homogenized in sterile water before plating serial dilutions on selective  $\frac{1}{2}$  salt  
550 LB agar plates. The plates were placed at 28°C for 1.5 days and the bacterial  
551 growth was calculated as colony-forming units.

552 For gene expression assays, sterile seeds were sown on  $\frac{1}{2}$  solid MS medium  
553 to germinate and grown for 3-4 days in long day conditions. Seedlings were  
554 then transferred into  $\frac{1}{2}$  liquid MS medium in 12-well culture plates (Thermo  
555 Fisher Scientific, Waltham, MA, US), and grown for another six or seven days.  
556 Each well contained three seedlings (pulled together as one sample), and  
557 every experiment included three independent samples from three  
558 independent wells. Seedlings were inoculated with  $5 \times 10^7$  cfu/ml of *Pto*  
559 DC3000 or *Pto* DC3000 (AvrRpt2), and samples were collected 6 hours after  
560 inoculation.

561

#### 562 **Treatments with immune elicitors**

563 Sterile seeds were sown on  $\frac{1}{2}$  solid MS medium to germinate and grown for  
564 3-4 days in long day conditions. Seedlings were then transferred into  $\frac{1}{2}$  liquid  
565 MS medium in 12-well culture plates (Thermo Fisher Scientific, Waltham, MA,  
566 US), and grown for another six or seven days. Each well contained 3  
567 seedlings (pulled together as one sample), and every experiment included 3  
568 independent samples from 3 independent wells. The flg22 peptide or salicylic



569 acid were added into the liquid medium to a final concentration of 100 nM and  
570 0.5 mM, respectively. All the plates were incubated on a shaker for 5-10  
571 minutes following addition of the elicitor. Samples were harvested into 1.5 ml  
572 tubes at different time points after treatment, as indicated in the figures.

573

#### 574 **Root growth assay**

575 Sterile seeds were sown on ½ solid MS medium and stratified at 4°C for 3  
576 days. Then the plates were placed into a growth chamber for 1 day. The  
577 germinated seedlings were transferred to the new ½ solid MS medium  
578 (square plates). Square plates were placed vertically into a growth chamber  
579 and root length was measured 5 days later.

580

#### 581 **RNA isolation, RT-PCR, and RT-qPCR**

582 For RNA extraction, plant tissues were collected in 1.5 ml microfuge tubes  
583 with one metal bead and the tubes were immediately placed into liquid  
584 nitrogen. Samples were ground thoroughly with a TissueLyser (QIAGEN,  
585 Duesseldorf, Nordrhein-Westfalen, Germany) for 1 minute, and placed back in  
586 liquid nitrogen. Total RNA was extracted with the E.Z.N.A. Plant RNA kit  
587 (Omega Bio-Tek, Norcross, GA, US) with in-column DNA digestion and an  
588 additional sample treatment with DNAase (Omega Bio-Tek, Norcross, GA,  
589 US). First-strand cDNA was synthesized using the iScript cDNA synthesis kit  
590 (Bio-Rad, Hercules, CA, US) with a volume of 20 µl. For RT-PCR, the PCR  
591 reaction was performed in 50 µl using the Q5 Hot Start High-Fidelity DNA  
592 polymerase (New England Biolabs, Ipswich, MA, US) with 35 or 38 cycles.  
593 For quantitative RT-PCR (RT-qPCR), PCR reactions were performed in 20 µl

594 using the iTaq Universal SYBR Green Supermix kit (Bio-Rad, Hercules, CA,  
595 US) in the StepOnePlus Real-Time PCR System (Applied Biosystems, Foster  
596 City, CA, US). Data were analyzed with Excel and GraphPad Prism 6.

597

### 598 **Confocal microscopy imaging**

599 Cotyledons from 3-4 day-old long day-grown *Arabidopsis* seedlings were  
600 imaged using a Confocal Laser Scanning Microscope (CLSW) Platform: Leica  
601 TCS SP8 (Leica, Mannheim, Germany). The GFP was excited with an argon  
602 laser at 488 nm, and its emission was detected at 500-550 nm. For  
603 plasmolysis assays, cotyledons were placed into a 1 M NaCl solution on glass  
604 slides, and GFP was observed and recorded after 5-10 minutes. For FM4-64  
605 staining, cotyledons from 4 day-old seedlings were cut and soaked into 5  
606 ng/ $\mu$ l FM4-64 solution as described previously (Beck et al., 2012) for 5  
607 minutes; samples were then transferred to water on glass slides and covered  
608 with coverslips. For dual channel simultaneous observation, the fluorescence  
609 signal of FM4-64 was excited with an argon laser at 561 nm and its emission  
610 was observed at 580-650 nm; the GFP was excited at 488 nm and observed  
611 at 500-550 nm. For co-localization assays, 3 week-old *N. benthamiana* leaves  
612 were co-infiltrated with *Agrobacterium* GV3101 (pMP90) carrying plasmids to  
613 express *RFP-IAN9* and *GFP-IAP1*. Leaves were co-infiltrated with the  
614 GV3101 strain carrying plasmids to express *RFP-IAN9* and *GFP* as control.  
615 Three-mm leaf discs were punched from the whole leaf 24 hours post  
616 infiltration and transferred to water on glass slides. For dual channel image  
617 acquisition, GFP and RFP were excited at 488 nm and 561nm respectively;  
618 emission was collected at 500-550 nm for GFP and 580-650nm for RFP.

619

620 **MAPK activation and western blot assays**

621 For protein extraction, Arabidopsis seedlings or leaf discs from *N.*  
622 *benthamiana* were ground with a Tissue Lyser (QIAGEN, Hilden, Nordrhein-  
623 Westfalen, Germany). Samples were then re-suspended in lysis buffer [2x  
624 loading buffer: 100 mM Tris-HCl (pH 6.8), 10% Glycerol, 2% SDS, 0.03%  
625 bromophenol blue], boiled at 95°C for 10 minutes, and centrifuged at 14,000 g  
626 for 5 minutes before loading in SDS-PAGE acrylamide gels. Western blots  
627 were performed using anti-GFP (Sigma G6795), anti-Luciferase (Sigma  
628 L0159), anti-Mouse IgG-Peroxidase (Sigma A2554), and anti-Rabbit IgG-  
629 Peroxidase (Sigma A0545).

630 MAPK activation assays were performed as previously described (Macho et  
631 al, 2012), with minor modifications. Briefly, 7 day-old Arabidopsis seedlings  
632 grown on solid ½ MS were transferred to water and then treated with 100 nM  
633 flg22 for 10 minutes after vacuuming 5 minutes (15 minutes in total). Anti-  
634 pMAPK [Phospho-p44/42 MAPK (Erk1/2) (Thr202/Tyr204) XP Rabbit mAb;  
635 Cell Signaling 4370] was dissolved in 3% gelatin (Sigma G7041) and used to  
636 hybridize the membranes. All membranes were stained with Ponceau stain  
637 (Sangon Biotech, Shanghai, China) to verify equal loading.

638

639 **ROS burst**

640 ROS burst assays were conducted as previously described (Sang and Macho,  
641 2017). Briefly, 4 mm leaf discs from 5-6 week-old Arabidopsis plants grown in  
642 short day conditions were transferred to 96-well microplates (PerkinElmer,  
643 Waltham, MA, US) with 100 µl Mili-Q water per well and incubated overnight.

644 Water was then removed and ROS burst was elicited by adding 100  $\mu$ l of a  
645 solution containing 100 ng flg22, 100  $\mu$ M luminol, and 20  $\mu$ g/mL horseradish  
646 peroxidase. The luminescence was recorded over 40 minutes using a Thermo  
647 Scientific VARIOSKAN FLASH (Thermo Fisher Scientific, Waltham, MA, US).

648

#### 649 **Co-IP and large-scale IP for LC-MS/MS**

650 Leaves from 3-4 week-old *N. benthamiana* plants were co-infiltrated with  
651 *Agrobacterium* GV3101 (pMP90) carrying plasmids to express *GFP-IAP1* and  
652 *Cluc-IAN9*; leaves co-infiltrated with GV3101 carrying plasmids to express  
653 *GFP-AIP1* and *Cluc* or *GFP* and *Cluc* were used as controls. Total proteins  
654 were extracted 24 hours later, and immunoprecipitation was performed with  
655 GFP-trap beads (Chromotek, Am Klopferspitz, Planegg-Martinsried,  
656 Germany) as described previously (Sang et al, 2016). Proteins were stripped  
657 from the beads by boiling in 50  $\mu$ l SDS loading buffer for 10 mins.  
658 Immunoprecipitated proteins were separated on SDS-PAGE acrylamide gels  
659 and western blots were performed as described above. Large-scale  
660 immunoprecipitation assays for LC-MS/MS were performed as described  
661 before (Kadota et al. 2016; Sang et al. 2016), using 5 g of 10 day-old  
662 Arabidopsis seedlings before or after treatment with 100 nM flg22 or 0.5 mM  
663 SA.

664

#### 665 **Plasmid construction**

666 See Table S3 for the sequence of all the primes used in this study. Free GFP  
667 fragment (with stop codon) was amplified from the plasmid pGWB505  
668 (Nakagawa et al, 2007). The purified PCR product was transferred into entry

669 vector pDONR/ZEO (Thermo Fisher Scientific, Waltham, MA, US) by BP  
670 reaction, and then recombined into pGWB602 (Nakagawa et al., 2007; 35S  
671 promoter, no tag) using LR reaction to yield the pGWB602-*GFP* plasmid. The  
672 CDS of *IAN9*, *IAN9* ( $\Delta C27aa$ ), *IAN8*, *IAP1* (all with stop codon) were  
673 amplified from cDNA of whole Arabidopsis seedlings using primers containing  
674 attB1attB2 sites (Table S2). The PCR fragments were ligated into  
675 pDONR/ZEO by BP reaction, and then recombined with the binary vector  
676 pGWB606 (Nakagawa et al., 2007; 35S pro, N-sGFP) to yield the plasmids  
677 pGWB606-*IAN9*, pGWB606-*IAN9* ( $\Delta C27aa$ ), pGWB606-*IAN8*, and  
678 pGWB606-*IAP1* through an LR reaction. pDONR/ZEO-*IAN9* was also  
679 recombined with the binary vector pGWB555 (35S promoter, N-mRFP) to  
680 yield the plasmid pGWB555-*IAN9* through an LR reaction.

681 For luciferase complementation assays, the original vectors (Chen et al, 2008)  
682 were modified to make them Gateway-compatible. The binary vector  
683 pCAMBIA1300-nLUC was digested with *SacI* and *SalI* and pCAMBIA1300-  
684 cLUC was digested with *KpnI* and *SalI*. The gateway cassette was then  
685 amplified from pGWB505 with primers Nluc-F/R and Cluc-F/R (Table S1) and  
686 PCR products were cloned into the digested pCAMBIA1300 vectors using  
687 ClonExpress® II One Step Cloning Kit (Vazyme Biotech, Nanjing, China) to  
688 yield the new version of the binary plasmids, pGWB-*Nluc* and pGWB-*Cluc*  
689 containing the Gateway cassette. Then, pDONR/ZEO-*IAP1* (without stop  
690 codon) and pDONR/ZEO-*IAN9* were separately recombined with pGWB-*Nluc*  
691 and pGWB-*Cluc* through an LR reaction to yield the destination vectors  
692 pGWB-C3HC4-*Nluc* and pGWB-*Cluc-IAN9*.

693 For CRISPR/Cas9-mediated mutagenesis, the detailed sites were predicted  
694 using the CRISPR Design tool (<http://crispr.mit.edu/>). Primer sequences can  
695 be found in the Table S3. PCR products were ligated into the pCAS9 plasmid  
696 (Feng et al., 2013) using T4 DNA ligase (New England Biolabs, Ipswich, MA,  
697 US).

698

### 699 **Arabidopsis transformation**

700 For the generation of Arabidopsis transgenic lines, *Agrobacterium*-mediated  
701 transformation was performed according to the method described before  
702 (Clough and Bent, 1998). The *Agrobacterium tumefaciens* strain GV3101  
703 (pMP90) carrying the desired plasmids (pGWB602-*GFP*, pGWB605-*IAN9*,  
704 pGWB606-*IAN9*, pGWB605-*IAN8*, pGWB606-*IAN9* ( $\Delta C$ -27 aa)) were  
705 cultured overnight at 28°C, then spun down and re-suspended to OD<sub>600</sub>=1 in  
706 50 ml 5% sucrose and 0.03% silwet-L77 solution. The fertilized siliques from  
707 5-6 week-old Col-0 wild type plants (grown in a 16 h light/8 h dark  
708 photoperiod) were removed before flower dipping. After dipping for 1-2  
709 minutes, the plants were covered with PE cling wrap for 16-24 hours in the  
710 dark, and then put back to normal growth conditions until seed collection.  
711 Finally, homozygous transgenic lines were obtained after resistance selection  
712 (BASTA, 15 µg/ml; hygromycin B, 25 µg/ml) and segregation ratio calculation.  
713 For the generation of the *ian9* mutant, *A. tumefaciens* GV3101 carrying the  
714 plasmid pCas9 (35S, AtU6, Hpt)-*IAN9* was used to transform Col-0 wild type  
715 Arabidopsis plants. T1 plants were selected in ½ solid MS (25 µg/ml,  
716 hygromycin B), and then transferred to soil. Genomic DNA was extracted from  
717 two-week-old soil-grown T1 plants using the CTAB method (Doyle and Doyle,

718 1987). *IAN9* was amplified from independent DNA samples and sequenced.  
719 The plants that possessed a double peak in the sequencing results of the  
720 target sequence were chosen for collection of T1 seeds. Independent T1  
721 seeds were sown on selective (25 µg/ml, Hygromycin B) and non-selective ½  
722 solid MS medium and the segregation ratio was calculated. Lines with 3:1  
723 ratio were transferred to the soil. *IAN9* and *CAS9* genes were amplified by  
724 PCR, and plants without the *CAS9* product were selected. Homozygous  
725 CRISPR/CAS9 mutant *ian9* lines without *CAS9* background were selected for  
726 further experiments.

727

#### 728 ***Agrobacterium*-mediated transient expression in *N. benthamiana***

729 *A. tumefaciens* GV3101 carrying the desired plasmid (pGWB606-*IAP1*,  
730 pGWB555-*IAN9*, pGWB-*Cluc*, pGWB-*Cluc-IAN9*, pGWB-*Nluc-IAP1*) were  
731 grown on selective LB plates (10 g Tryptone, 5 g Yeast Extract, 10 g NaCl, 15  
732 g Agar per litre) and cultivated at 28°C for 2 days. Before infiltrating 3-4 week-  
733 old *N. benthamiana* plants, *Agrobacterium* cells were resuspended in the  
734 infiltration buffer (10 mM MgCl<sub>2</sub>, 10 mM MES pH 5.6, acetosyringone 150 µM)  
735 directly from plates, and diluted to an OD<sub>600</sub> of 0.5 or 1, depending on the  
736 expression and stability of the different proteins. Samples were collected 24  
737 hours after *Agrobacterium* infiltration.

738

#### 739 **Luciferase complementation assay**

740 Luciferase complementation assays were performed as previously described  
741 (Chen et al, 2008). Three-week-old *N. benthamiana* leaves were co-infiltrated  
742 with *Agrobacterium* GV3101 (pMP90) carrying the plasmids to induce the

743 expression of *IAP1-Nluc* and *Cluc-IAN9*. One day after inoculation, the whole  
744 leaves were cut and sprayed with luciferin solution [1mM luciferin (Sigma),  
745 0.02% Triton X-100]. The fluorescence signal was recorded using a  
746 Lumazone 1300B (Scientific Instrument, West Palm Beach, FL, US) for 10  
747 minutes after 5 minutes in the dark.

748

#### 749 **Fluorescence Resonance Energy Transfer - Fluorescence-lifetime** 750 **imaging microscopy (FRET-FLIM)**

751 Three-week-old *N. benthamiana* leaves were co-infiltrated with *Agrobacterium*  
752 GV3101 (pMP90) carrying the plasmids to induce the expression of *GFP-IAP1*  
753 with *RFP-IAN9* (FRET pair: donor + acceptor); leaves infiltrated with GV3101  
754 inducing the expression of *GFP-IAP1* with *RFP* (donor + free RFP) and *GFP-*  
755 *IAP1* (donor alone) were used as negative control. FRET-FLIM experiments  
756 were performed on a Leica TCS SMD FLCS confocal microscope. Six-mm  
757 leaf discs of *N. benthamiana* plants transiently co-expressing donor and  
758 acceptor were visualized one day after agroinfiltration. The lifetime of the  
759 donor ( $\tau$ ) was collected and analysed as described in (Rosas-Diaz et al.,  
760 2018).

761

#### 762 **Chemicals**

763 The flg22 peptide (TRLSSGLKINSKDDAAGLQIA) was purchased from  
764 Abclonal, USA. Sequencing-grade modified trypsin was purchased from  
765 Promega (Madison, WI, USA). All other chemicals were purchased from  
766 Sigma-Aldrich (St. Louis, MO, USA) unless otherwise stated.

767



768 **Acknowledgements**

769 We thank members of the Macho and Lozano-Durán laboratories for helpful  
770 discussions; Jianming Li, Jian-Min Zhou and Jian-Kang Zhu for sharing  
771 biological materials; and Xinyu Jian for technical and administrative  
772 assistance during this work. We thank the PSC Cell Biology core facility for  
773 assistance with confocal microscopy, and the PSC Proteomics core facility for  
774 LC-MS/MS analysis. This work was supported by the Shanghai Center for  
775 Plant Stress Biology (Chinese Academy of Sciences). Research in the Macho  
776 laboratory is also supported by the National Natural Science Foundation of  
777 China (NSFC; grant 31571973) and the Chinese 1000 Talents Program.  
778 Research in the Lozano-Durán laboratory is also supported by the National  
779 Natural Science Foundation of China (NSFC; grant 31671994) and the 100  
780 Talents Program from the Chinese Academy of Sciences. CCM is sponsored  
781 by a CAS-TWAS President's Fellowship for International PhD Students. TR-D  
782 is the recipient of a President's International Fellowship Initiative (PIFI)  
783 postdoctoral fellowship (No. 2016PB042) from the Chinese Academy of  
784 Sciences. The authors have no conflict of interest to declare.

785

786 **Literature cited**

787

788 Beck M, Zhou J, Faulkner C, MacLean D, Robatzek S. 2012. Spatio-temporal  
789 cellular dynamics of the Arabidopsis flagellin receptor reveal activation status-  
790 dependent endosomal sorting. *Plant Cell* 24: 4205-4219.

791

792 Bigeard J, Colcombet J, Hirt H. 2015. Signaling mechanisms in pattern-  
793 triggered immunity (PTI). *Mol Plant* 8: 521-539.

794

795 Boller T, Felix G. 2009. A Renaissance of Elicitors: Perception of Microbe-  
796 Associated Molecular Patterns and Danger Signals by Pattern-Recognition  
797 Receptors. *Annu Rev Plant Biol* 60: 379-406.

798

799 Bolte S, Talbot C, Boutte Y, Catrice O, Read ND, Satiat-Jeunemaitre B. 2004.  
800 FM-dyes as experimental probes for dissecting vesicle trafficking in living  
801 plant cells. *J Microsc* 214: 159-173.

802

803 Bourne HR, Sanders DA, McCormick F. 1991. The GTPase superfamily:  
804 conserved structure and molecular mechanism. *Nature* 349: 117-127.

805

806 Campos ML, Yoshida Y, Major IT, de Oliveira Ferreira D, Weraduwege SM,  
807 Froehlich JE, Johnson BF, Kramer DM, Jander G, Sharkey TD and Howe GA.  
808 (2016). Rewiring of jasmonate and phytochrome B signalling uncouples plant  
809 growth-defense tradeoffs. *Nature Comms*, 7, 12570.

810

811 Chen H, Zou Y, Shang Y, Lin H, Wang Y, Cai R, Tang X, Zhou JM. 2008.  
812 Firefly luciferase complementation imaging assay for protein-protein  
813 interactions in plants. *Plant Physiol* 146: 368-376.

814

815 Chiang YH, Coaker G. 2015. Effector Triggered Immunity: NLR Immune  
816 Perception and Downstream Defense Responses. *The Arabidopsis Book*.  
817 American Society of Plant Biologists, 13: e0183.

818

819 Clough SJ, Bent AF. 1998. Floral dip: a simplified method for *Agrobacterium*-  
820 mediated transformation of *Arabidopsis thaliana*. *Plant J* 16: 735-743.

821

822 Cook DE, Mesarich CH, Thomma BPHJ. 2015. Understanding Plant Immunity  
823 as a Surveillance System to Detect Invasion. *Annual Review of*  
824 *Phytopathology*, Vol 53: 541-563.

825

826 Couto D, Zipfel C. 2016. Regulation of pattern recognition receptor signalling  
827 in plants. *Nat Rev Immunol* 16: 537-552.

828

829 de Wit M, Spoel SH, Sanchez-Perez GF, Gommers CMM, Pieterse CMJ,  
830 Voesenek LACJ, Pierik R. 2013. Perception of low red:far-red ratio  
831 compromises both salicylic acid- and jasmonic acid-dependent pathogen  
832 defences in *Arabidopsis*. *Plant J* 75: 90-103.

833

834 Delaney TP, Uknes S, Vernooij B, Friedrich L, Weymann K, Negrotto D,  
835 Gaffney T, Gut-Rella M, Kessmann H, Ward E, et al. 1994. A central role of  
836 salicylic Acid in plant disease resistance. *Science* 266: 1247-1250.

837

838 Feng Z, Zhang B, Ding W, Liu X, Yang DL, Wei P, Cao F, Zhu S, Zhang F,  
839 Mao Y, et al. 2013. Efficient genome editing in plants using a CRISPR/Cas  
840 system. *Cell Res* 23: 1229-1232.

841

842 Fischer-Parton S, Parton RM, Hickey PC, Dijksterhuis J, Atkinson HA, Read  
843 ND. 2000. Confocal microscopy of FM4-64 as a tool for analysing endocytosis  
844 and vesicle trafficking in living fungal hyphae. *J Microsc* 198: 246-259.

845

846 Gurr SJ, Rushton PJ. 2005. Engineering plants with increased disease  
847 resistance: how are we going to express it? *Trends Biotechnol* 23:283-90.

848

849 Huot B, Yao J, Montgomery BL, He SY. 2014. Growth-defense tradeoffs in  
850 plants: a balancing act to optimize fitness. *Mol Plant* 7: 1267-1287.

851

852 Kadota Y, Macho AP, Zipfel C. 2016. Immunoprecipitation of Plasma  
853 Membrane Receptor-Like Kinases for Identification of Phosphorylation Sites  
854 and Associated Proteins. *Methods Mol Biol* 1363: 133-144.

855

856 Khan M, Subramaniam R, Desveaux D. 2016. Of guards, decoys, baits and  
857 traps: pathogen perception in plants by type III effector sensors. *Curr Opin*  
858 *Microbiol* 29: 49-55.

859 Kusch S, Panstruga R. 2017. mlo-Based Resistance: An Apparently Universal  
860 "Weapon" to Defeat Powdery Mildew Disease. *Mol Plant Microbe Interact*  
861 30:179-189.

862

863 Liu C, Wang T, Zhang W, Li X. 2008. Computational identification and  
864 analysis of immune-associated nucleotide gene family in *Arabidopsis thaliana*.  
865 *J Plant Physiol* 165: 777-787.

866

867 Macho AP. 2016. Subversion of plant cellular functions by bacterial type-III  
868 effectors: beyond suppression of immunity. *New Phytol* 210: 51-57.

869

870 Macho AP, Boutrot F, Rathjen JP, Zipfel C. 2012. Aspartate oxidase plays an  
871 important role in *Arabidopsis* stomatal immunity. *Plant Physiol* 159: 1845-  
872 1856.

873

874 Macho AP, Zipfel C. 2014. Plant PRRs and the activation of innate immune  
875 signaling. *Mol Cell* 54: 263-272.

876

877 Macho AP, Zipfel C. 2015. Targeting of plant pattern recognition receptor-  
878 triggered immunity by bacterial type-III secretion system effectors. *Curr Opin*  
879 *Microbiol* 23: 14-22.

880

881 Mao Y, Zhang H, Xu N, Zhang B, Gou F, Zhu JK. 2013. Application of the  
882 CRISPR-Cas system for efficient genome engineering in plants. *Mol Plant* 6:  
883 2008-2011.

884

885 Melotto M, Underwood W, Koczan J, Nomura K, He SY. 2006. Plant stomata  
886 function in innate immunity against bacterial invasion. *Cell* 126:969-80.

887

888 Nakagawa T, Kurose T, Hino T, Tanaka K, Kawamukai M, Niwa Y, Toyooka  
889 K, Matsuoka K, Jinbo T, Kimura T. 2007. Development of series of gateway  
890 binary vectors, pGWBs, for realizing efficient construction of fusion genes for  
891 plant transformation. *J Biosci Bioeng* 104: 34-41.

892

893 Nitta T, Nasreen M, Seike T, Goji A, Ohigashi I, Miyazaki T, Ohta T, Kanno M,  
894 Takahama Y. 2006. IAN family critically regulates survival and development of  
895 T lymphocytes. *PLoS Biol* 4: e103.

896

897 Park J, Kim S, Choi E, Auh CK, Park JB, Kim DG, Chung YJ, Lee TK, Lee S.  
898 2013. Altered invertase activities of symptomatic tissues on Beet severe curly  
899 top virus (BSCTV) infected *Arabidopsis thaliana*. *J Plant Res* 126:743-52.

900

901 Qu Y, Wang YY, Yin QS, Huang LL, Jiang YG, Li GZ, Hao L. 2018. Multiple  
902 biological processes involved in the regulation of salicylic acid in *Arabidopsis*  
903 response to NO<sub>2</sub> exposure. *Environmental and Experimental Botany* 149:9-  
904 16.

905

906 Nitta T, Takahama Y. 2007. The lymphocyte guard-IANs: regulation of  
907 lymphocyte survival by IAN/GIMAP family proteins. *Trends Immunol* 28: 58-  
908 65.

909

910 Reuber TL, Ausubel FM. 1996. Isolation of Arabidopsis genes that  
911 differentiate between resistance responses mediated by the RPS2 and RPM1  
912 disease resistance genes. *Plant Cell* 8: 241-249.

913

914 Rosas-Diaz T, Zhang D, Fan P, Wang L, Ding X, Jiang Y, Jimenez-Gongora  
915 T, Medina-Puche L, Zhao X, Feng Z, Zhang G, Liu X, Bejarano ER, Tan L,  
916 Zhang H, Zhu JK, Xing W, Faulkner C, Nagawa S, Lozano-Duran R. 2018. A  
917 virus-targeted plant receptor-like kinase promotes cell-to-cell spread of RNAi.  
918 *Proc Natl Acad Sci* 115:1388-1393.

919

920 Sang Y, Macho AP. 2017. Analysis of PAMP-Triggered ROS Burst in Plant  
921 Immunity. *Methods Mol Biol* 1578: 143-153.

922

923 Sang Y, Wang Y, Ni H, Cazale AC, She YM, Peeters N, Macho AP. 2016. The  
924 *Ralstonia solanacearum* type III effector RipAY targets plant redox regulators  
925 to suppress immune responses. *Mol Plant Pathol*.

926

927 Scheres B, van der Putten WH. 2017. The plant perceptron connects  
928 environment to development. *Nature* 543: 337-345.

929

930 Stael S, Kmicik P, Willems P, Van Der Kelen K, Coll NS, Teige M, Van  
931 Breusegem F. 2015. Plant innate immunity--sunny side up? *Trends Plant Sci*  
932 20: 3-11.

933

- 934 Takai Y, Sasaki T, Matozaki T. 2001. Small GTP-binding proteins. *Physiol*  
935 *Rev* 81: 153-208.
- 936
- 937 Tsuda K, Glazebrook J, Katagiri F. 2008. The interplay between MAMP and  
938 SA signaling. *Plant Signal Behav* 3: 359-361.
- 939
- 940 Vernoud V, Horton AC, Yang Z, Nielsen E. 2003. Analysis of the small  
941 GTPase gene superfamily of Arabidopsis. *Plant Physiol* 131: 1191-1208.
- 942
- 943 Vlot AC, Dempsey DA, Klessig DF. 2009. Salicylic Acid, a multifaceted  
944 hormone to combat disease. *Annu Rev Phytopathol* 47: 177-206.
- 945
- 946 Wang ZY, Seto H, Fujioaka S, Yoshida S, Chory J. 2001. BRI1 is a critical  
947 component of a plasma-membrane receptor for plant steroids. *Nature* 410:  
948 380-383.
- 949
- 950 Weiss Y, Foret S, Hayward DC, Ainsworth T, King R, Ball EE, Miller DJ. 2013.  
951 The acute transcriptional response of the coral *Acropora millepora* to immune  
952 challenge: expression of GiMAP/IAN genes links the innate immune  
953 responses of corals with those of mammals and plants. *BMC Genomics* 14:  
954 400.
- 955
- 956 Wildermuth MC, Dewdney J, Wu G, Ausubel FM. 2001. Isochorismate  
957 synthase is required to synthesize salicylic acid for plant defence. *Nature* 414:  
958 562-565.



959

960 Win J, Chaparro-Garcia A, Belhaj K, Saunders DG, Yoshida K, Dong S,  
961 Schornack S, Zipfel C, Robatzek S, Hogenhout SA, et al. 2012. Effector  
962 biology of plant-associated organisms: concepts and perspectives. *Cold*  
963 *Spring Harb Symp Quant Biol* 77: 235-247.

964

965 Xu G, Yuan M, Ai C, Liu L, Zhuang E, Karapetyan S, Wang S, Dong X. 2017.  
966 uORF-mediated translation allows engineered plant disease resistance  
967 without fitness costs. *Nature* 545:491-494.

968

969 Yi SY, Shirasu K, Moon JS, Lee SG, Kwon SY. 2014. The activated SA and  
970 JA signaling pathways have an influence on flg22-triggered oxidative burst  
971 and callose deposition. *PLoS One* 9: e88951.

972

973 Zipfel C. 2014. Plant pattern-recognition receptors. *Trends Immunol* 35: 345-  
974 351.

975

976

977

978 **Supplementary materials**

979

980 **Figure S1. Alignment of IAN proteins.**

981 **Figure S2. Expression of *IAN9* in *Arabidopsis* seedlings.**

982 **Figure S3. The C-terminal region of IAN9 is important for its PM**  
983 **localization.**

984 **Figure S4. Characterization of the GK-146B08 line with an insertion in**  
985 **the promoter of *IAN9*.**

986 **Figure S5. Exact mutation site in the *ian9* mutant generated by**  
987 **CRISPR/Cas9.**

988 **Figure S6. Characterization of the *ian9* mutant and *IAN9* over-expression**  
989 **lines.**

990 **Figure S7. Transcription of *IAN8* is not affected by over-expression of**  
991 ***IAN9*.**

992 **Figure S8. Plant growth and early immune responses are not affected by**  
993 **altered expression of *IAN9*.**

994 **Figure S9. Seedlings of the *ian9* mutant and *IAN9* over-expression do**  
995 **not show developmental defects.**

996 **Figure S10. Flg22-triggered ROS dynamics are not affected by**  
997 **alterations in *IAN9* expression.**

998 **Figure S11. *ian9* and *iap1* mutant lines do not have altered expression of**  
999 **SA-dependent defence-related genes.**

1000 **Figure S12. Analysis of the *ian9/35S::GFP-IAN9* complementation line.**

1001 **Figure S13. Transgenic lines overexpressing GFP-IAN9 in a wild type**  
1002 **background show a tendency to support higher bacterial loads**  
1003 **compared to wild type or GFP-expressing lines.**

1004 **Figure S14. Transgenic lines overexpressing GFP-IAN9 are not affected**  
1005 **in susceptibility to *Pto* DC3000 COR-.**

1006 **Figure S15. Characterization of IAP1.**

1007 **Figure S16. Cluc-IAN9 associates with GFP-IAP1 but not with free GFP in**  
1008 ***N. benthamiana* leaves.**

1009 **Figure S17. IAN9 and IAP1 do not interact directly in *N. benthamiana***  
1010 **leaves.**

1011 **Figure S18. Characterization of the *iap1* mutant alleles.**

1012 **Figure S19. Seedlings of the *iap1* mutant lines show slightly reduced**  
1013 **root elongation.**

1014 **Figure S20. *IAN9* orthologs in different plant species.**

1015 **Figure S21. *IAP1* orthologs in different plant species.**

1016

1017 **Table S1. Proteins associated to GFP-IAN9 identified after affinity**  
1018 **purification followed by LC-MS/MS analysis.**

1019 **Table S2. IAP1 interactors according to the Arabidopsis Interactome**  
1020 **Database.**

1021 **Table S3. List of primers used in this study**  
1022  
1023

1024 **Figure Legends**

1025

1026 **Figure 1. Transcription patterns of the *IAN* gene family in *Arabidopsis*.**

1027 (A) Phylogenetic tree of IAN proteins. The scale bar denotes a relative  
1028 measure of evolutionary distance. (B and C) Relative expression of *IAN7*,  
1029 *IAN8* and *IAN9* in 9-10 days-old *Arabidopsis* seedlings, 6 hours after  
1030 inoculation with *Pto* DC3000 (B) or *Pto* DC3000 (AvrRpt2) (C). Real-time  
1031 quantitative PCR results were normalized with *UBIQUITIN 10* (*UBQ10*,  
1032 AT4G05320). Values are means  $\pm$  SEM (n=3 biological replicates; see  
1033 methods). Statistical differences were calculated using one-way ANOVA  
1034 ( $p < 0.01$ ). Each experiment was performed three times with similar results.

1035

1036 **Figure 2. Treatment with flg22 or salicylic acid causes a reduction on the**  
1037 **transcription of *IAN9*.**

1038 Relative expression of *IAN9* in 9-10 days-old *Arabidopsis* seedlings.  
1039 Seedlings in (A) and (C) were treated with 100 nM flg22 for 1 hour. Seedlings  
1040 in (B) were treated with 0.5 mM salicylic acid for 3 or 6 hours. Real-time  
1041 quantitative PCR results were normalized with *UBIQUITIN 10* (*UBQ10*,  
1042 AT4G05320). Values are means  $\pm$  SEM (n=3 biological replicates; see  
1043 methods). Statistical differences were calculated using one-way ANOVA  
1044 ( $p < 0.01$ ). Each experiment were performed three times with similar results.

1045

1046 **Figure 3. GFP-*IAN9* localizes to the plasma membrane in *Arabidopsis***

1047 (A) Confocal images of GFP, GFP-*IAN9*, and BRI1-GFP in *Arabidopsis*  
1048 cotyledon epidermal cells. Bar=10  $\mu$ m. (B) Confocal images of GFP, GFP-

1049 IAN9, and BRI1-GFP in *Arabidopsis* cotyledon epidermal cells. *Arabidopsis*  
1050 seedlings were treated FM4-64 for 5 minutes before confocal imaging, and  
1051 the FM4-64 signal is shown in red. Bar=5  $\mu$ m. (C) Fluorescence intensity  
1052 through the thin lines shown in (B). (D) Confocal images of GFP, GFP-IAN9,  
1053 and BRI1-GFP in *Arabidopsis* cotyledon epidermal cells after plasmolysis (5-  
1054 minute treatment with 1M NaCl). Red arrows indicate the presence of Hectian  
1055 strands. Bar=10  $\mu$ m.

1056

1057 **Figure 4. IAN9 negatively regulates plant immunity against *Pto* DC3000.**

1058 (A) Growth of surface (spray)-inoculated *Pto* DC3000 ( $OD_{600}=0.1$ ) in wild-type  
1059 (WT) Col-0 and *ian9* mutant plants, 3 days post-inoculation (dpi). Experiments  
1060 repeated more than three times with similar results. (B) Growth of *Pto*  
1061 DC3000 (AvrRpt2) ( $OD_{600}=0.001$ ) infiltrated with a needleless syringe into  
1062 wild-type (WT) Col-0 and *ian9* mutant plants, 3 days post-inoculation (dpi).  
1063 Experiments performed twice with similar results. (A and B) Data were  
1064 represented as means  $\pm$  SE (n=8 independent plants). Statistical differences  
1065 were calculated using a Student's t-test. "ns" indicates no significant  
1066 difference, and asterisk indicated significant difference ( $p<0.05$ ).

1067

1068 **Figure 5. IAP1 interacts with IAN9 in *N. benthamiana* leaves.**

1069 (A) Confocal microscopy images showing the co-localization of GFP-IAP1 and  
1070 RFP-IAN9 in *N. benthamiana* leaves. Bar=10  $\mu$ m. (B) Cluc or Cluc-IAN9 was  
1071 co-expressed with GFP-IAP1 in *N. benthamiana* before immunoprecipitation  
1072 using GFP-trap beads. Immunoblots were analysed using anti-luc or anti-GFP

1073 antibody. Molecular weight (kDa) marker bands are indicated for reference.

1074 The experiments were repeated three with similar results.

1075

1076 **Figure 6. IAP1 negatively regulates plant immunity against *Pto* DC3000.**

1077 (A) Photography of four week-old Col-0 wild type (WT), *iap1-1*, and *iap1-2*

1078 plants, grown at a 8 h light/16 h dark photoperiod. Scale bar is 0.5 cm. (B)

1079 Growth of surface (spray)-inoculated *Pto* DC3000 ( $OD_{600}=0.1$ ) in wild-type

1080 (WT) Col-0, *iap1-1*, and *iap1-2* mutant plants, 3 days post-inoculation (dpi).

1081 Experiments repeated more than three times with similar results. (C) Growth

1082 of *Pto* DC3000 (AvrRpt2) ( $OD_{600}=0.001$ ) infiltrated with a needleless syringe

1083 into wild-type (WT) Col-0, *iap1-1*, and *iap1-2* mutant plants, 3 days post-

1084 inoculation (dpi). Experiments performed twice with similar results. (B and C)

1085 Data were represented as means  $\pm$  SE (n=8 independent plants). Statistical

1086 differences were calculated using a Student's t-test. "ns" indicates no

1087 significant difference, and asterisk indicated significant difference ( $p<0.05$ ).

1088

1089

1090

1091

1092

1093

1094

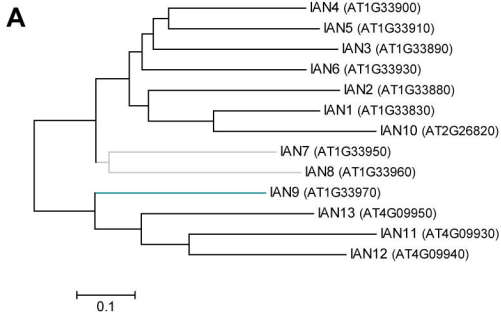

**B**

■ naive ■ mock ■ *Pto* DC3000

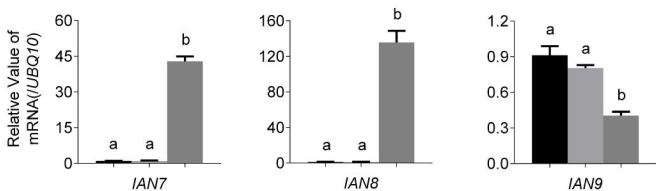

**C**

■ naive ■ mock ■ *Pto* DC3000 AvrRpt2

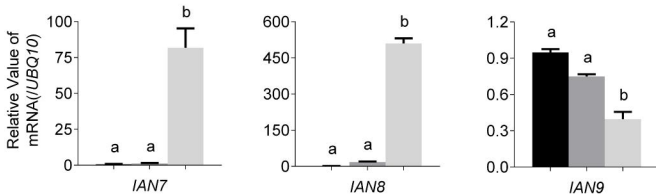

**A**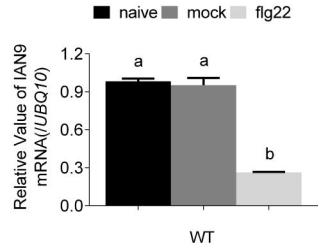**B**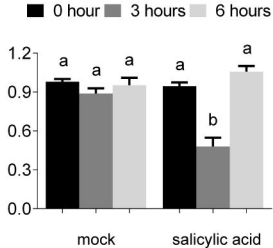**C**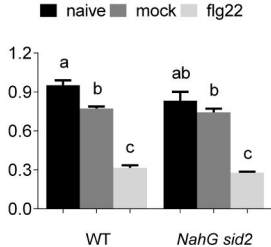



**A**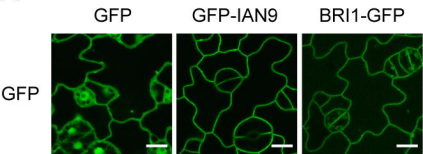**B**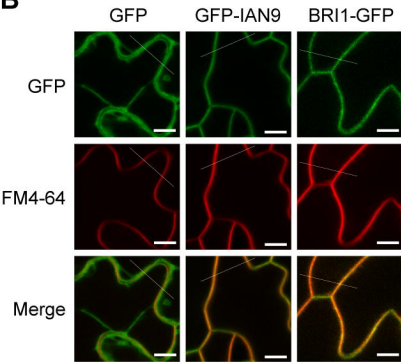**C**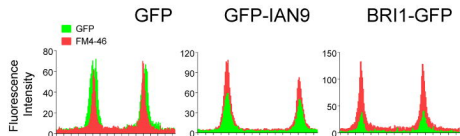**D**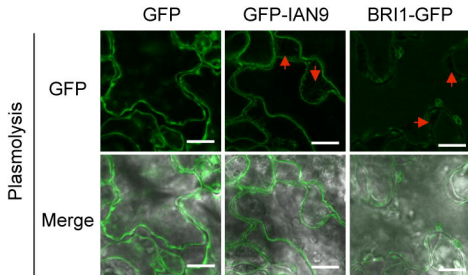

*Pto* DC3000

**A**

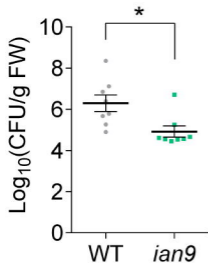

*Pto* DC3000 AvrRpt2

**B**

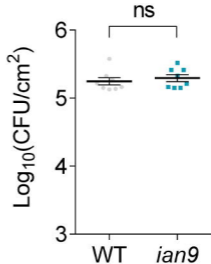

**A**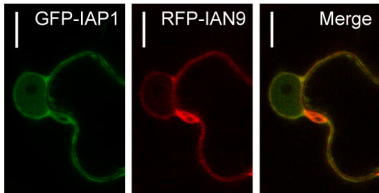**B**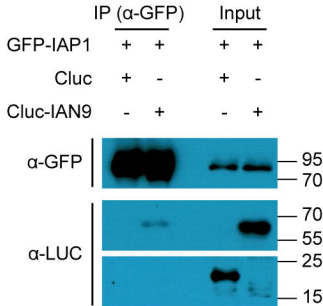

**A**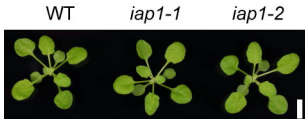**B***Pto* DC3000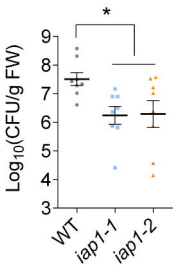**C***Pto* DC3000 AvrRpt2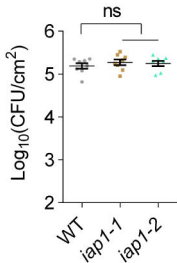

Source: https://www.biorxiv.org/content/10.1101/277269v3.full.pdf
